# Supplementary material for: Methylation and Demethylation of Emerging Contaminants Changed Bioaccumulation and Acute Toxicity in Daphnia magna
Source: PubMed Central journal article supplement (PMC10569044; doi:10.1021/acs.est.3c03242), 2023-09-28
Supplement: es3c03242_si_001.pdf [file es3c03242_si_001.pdf]

## Methylation and demethylation of emerging contaminants changed bioaccumulation and acute toxicity in *Daphnia magna*

**Text 1.** Calculation of physicochemical property parameters

The pH of the artificial freshwater environment for *D. magna* was measured as  $8.10 \pm 0.10$ . The fraction of neutral species ( $f_n$ ) for the test compounds was calculated as the following equation:<sup>1-3</sup>

$$f_n = \frac{1}{1 + 10^{i(\text{pH} - \text{p}K_a)}} \quad (1)$$

where  $i$  is 1 for acids and -1 for bases. The pH-adjusted octanol-water coefficient  $\log D_{ow}$  was estimated as:

$$\log D_{ow} = \log K_{ow} + \log f_n \quad (2)$$

The pH-adjusted liposome-water partition coefficient ( $\log D_{lipw}$ ) was calculated using the following equation:<sup>4</sup>

$$\log D_{lipw} = 0.9 * \log D_{ow} + 0.52 \quad (3)$$

The physicochemical parameters of all target compounds are summarized in Table 1. The relationship between  $\log D_{lipw}$  of the target compounds and their corresponding acute toxicity ( $LC_{50}$ ) and bioconcentration factor (BCF) was evaluated through linear regression analysis (Figure S2).

**Table S1.** MRM transitions for test compounds on UPLC-MS/MS

| Compound                 | MRM (m/z)       |        |                 |       |
|--------------------------|-----------------|--------|-----------------|-------|
|                          | Quantification  | CV/CE* | Qualification   | CV/CE |
| ESI+                     |                 |        |                 |       |
| Acetaminophen            | 151.97 > 109.99 | 38/22  |                 |       |
| M-Acetaminophen          | 166.03 > 124.07 | 38/22  | 166.03 > 92.74  | 38/24 |
| <i>d4</i> -Acetaminophen | 156.03 > 113.99 | 40/12  | 156.03 > 96.75  | 40/22 |
| DM-diazepam              | 271.03 > 139.99 | 56/28  | 271.03 > 165.03 | 56/28 |
| Diazepam                 | 285.03 > 154.02 | 56/26  | 285.03 > 193.09 | 56/32 |
| <i>d5</i> -Diazepam      | 290.10 > 198.07 | 54/34  | 290.10 > 154.11 | 54/26 |
| ESI-                     |                 |        |                 |       |
| DM-Methylparaben         | 137.09 > 93.08  | 34/15  |                 |       |
| Methylparaben            | 151.05 > 92.03  | 38/20  | 151.05 > 136.00 | 38/14 |
| <i>d4</i> -Methylparaben | 155.05 > 96.05  | 36/20  | 155.05 > 140.01 | 36/14 |
| DM-Naproxen              | 215.15 > 171.15 | 21/6   | 215.15 > 169.15 | 21/28 |
| Naproxen                 | 229.15 > 185.15 | 17/8   | 229.15 > 170.15 | 17/16 |
| <i>d3</i> -Naproxen      | 232.18 > 188.10 | 14/5   | 232.18 > 173.14 | 14/18 |

\*CV-cone voltage (kV), CE-collision energy (eV).

**Table S2.** Recoveries and limits of quantification (LOQ) of test compounds.

| Compound         | LOQ (ng/mL) | Recovery (%)    |             |
|------------------|-------------|-----------------|-------------|
|                  |             | <i>D. magna</i> | AFW         |
| Acetaminophen    | 0.5         | 84.6 ± 5.3      | 87.4 ± 1.8  |
| M-acetaminophen  | 0.2         | 62.0 ± 5.7      | 99.6 ± 2.3  |
| DM-diazepam      | 0.2         | 103.5 ± 11.0    | 105.0 ± 2.7 |
| Diazepam         | 0.25        | 128.4 ± 3.2     | 94.3 ± 2.3  |
| DM-methylparaben | 3.0         | 51.9 ± 7.3      | 72.6 ± 12.3 |
| Methylparaben    | 1.5         | 95.8 ± 3.2      | 116.8 ± 1.8 |
| DM-naproxen      | 3.0         | 60.9 ± 12.6     | 119.8 ± 2.2 |
| Naproxen         | 2.0         | 127.6 ± 1.1     | 106.4 ± 1.3 |

**Table S3.** Bioaccumulation kinetic parameters of the target CECs in *D. magna*.

| Compound         | $k_u$ (L kg <sup>-1</sup> h <sup>-1</sup> ) | R <sup>2</sup> | $k_d$ (h <sup>-1</sup> ) | R <sup>2</sup> |
|------------------|---------------------------------------------|----------------|--------------------------|----------------|
| Acetaminophen    | 0.2 ± 0.0                                   | 0.991          | 0.8 ± 0.0                | 1.000          |
| M-Acetaminophen  | 17.3 ± 0.4                                  | 0.982          | 1.7 ± 0.0                | 1.000          |
| DM-Diazepam      | 1.2 ± 0.1                                   | 0.900          | 0.1 ± 0.0                | 0.968          |
| Diazepam         | 4.1 ± 0.3                                   | 0.879          | 0.4 ± 0.2                | 0.926          |
| DM-Methylparaben | 0.3 ± 0.0                                   | 0.620          | 0.3 ± 0.1                | 0.895          |
| Methylparaben    | 0.7 ± 0.1                                   | 0.855          | 0.2 ± 0.0                | 0.986          |
| DM-Naproxen      | –                                           | –              | –                        | –              |
| Naproxen         | 0.2 ± 0.0                                   | 0.855          | 0.2 ± 0.1                | 0.868          |

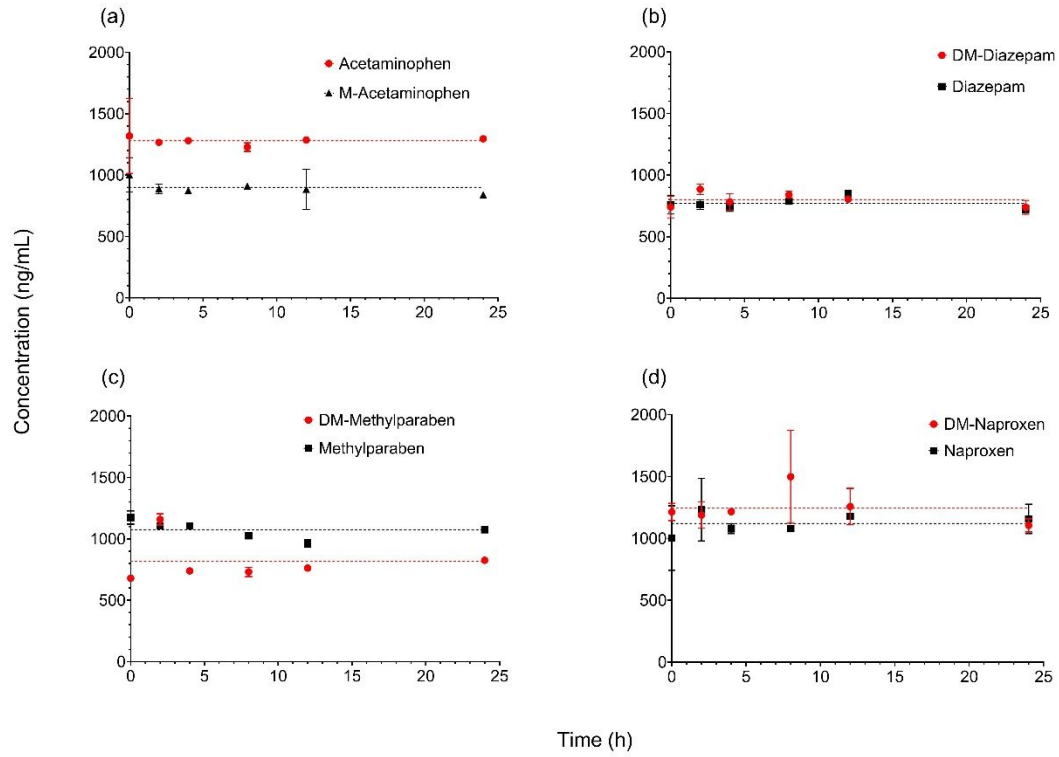

**Figure S1.** Concentrations of test compounds in the artificial freshwater during the uptake phase.

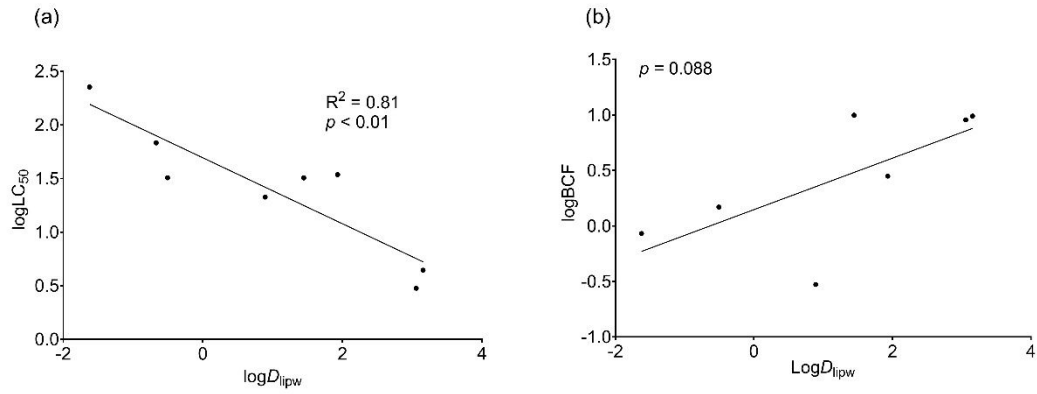

**Figure S2.** Relationships between  $\log D_{lipw}$  and (a)  $\log LC_{50}$  and (b)  $\log BCF$ .

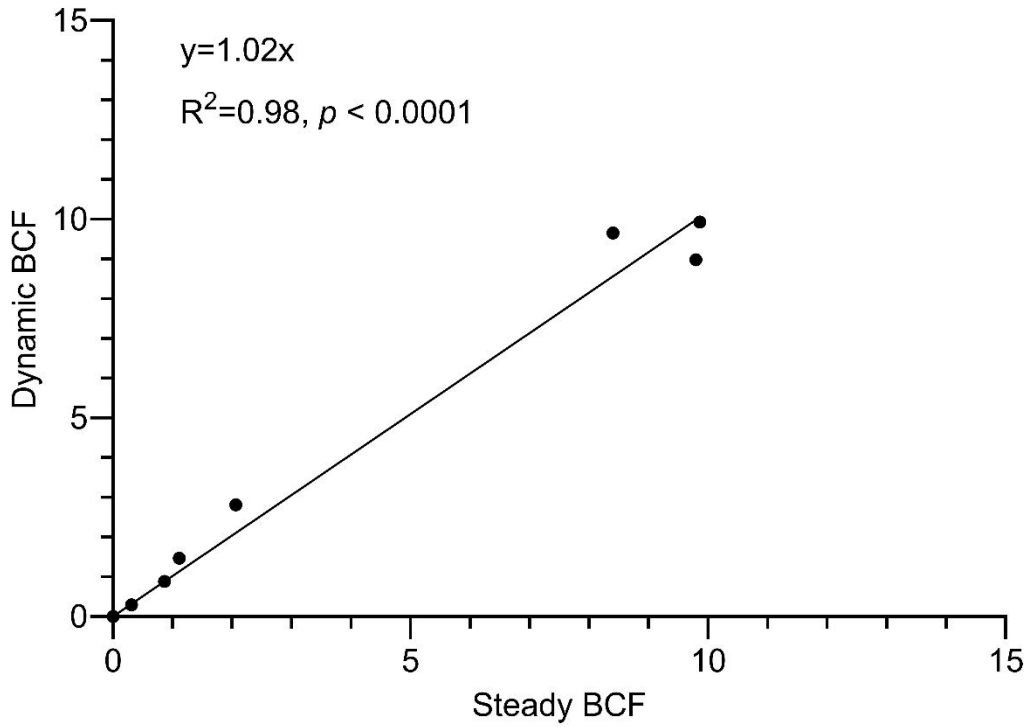

Figure S3. The correlation between steady state BCF and dynamic BCF in *D. magna*

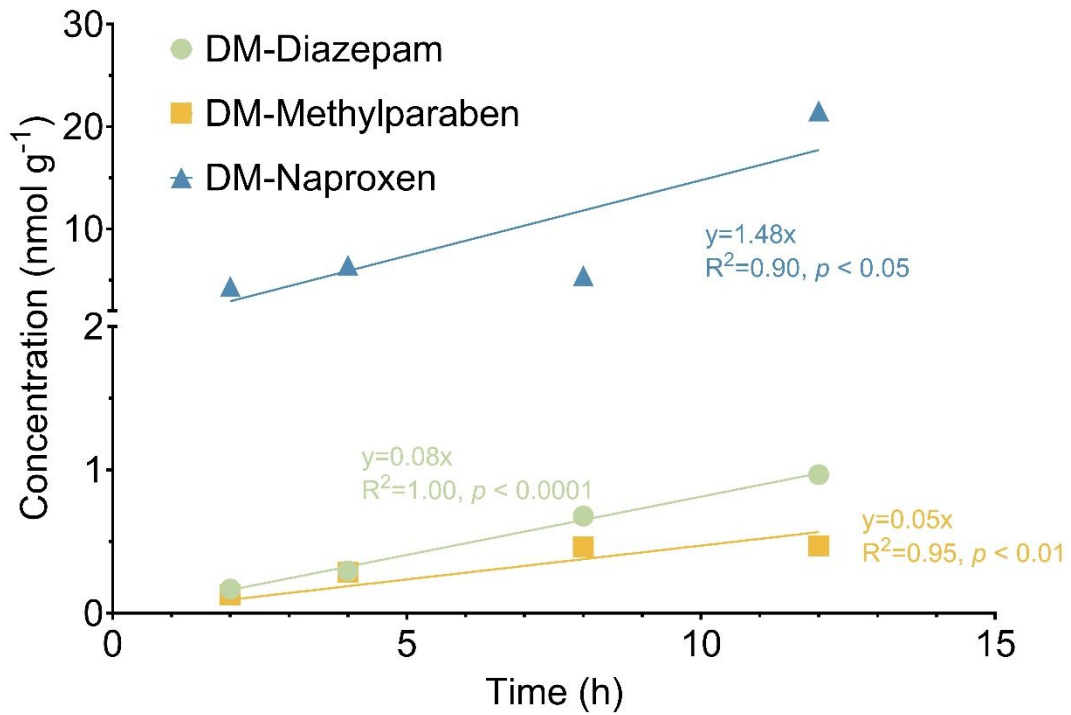

Figure S4. Linear correlations between the concentration of the formed demethylated derivatives in *D. magna* and the exposure time to the corresponding methylated parent compounds

## References

- (1) Wu, X.; Ernst, F.; Conkle, J. L.; Gan, J. Comparative Uptake and Translocation of Pharmaceutical and Personal Care Products (PPCPs) by Common Vegetables. *Environ Int* **2013**, *60*, 15–22.  
<https://doi.org/10.1016/j.envint.2013.07.015>.
- (2) Xiong, Y.; Shi, Q.; Sy, N. D.; Dennis, N. M.; Schlenk, D.; Gan, J. Influence of Methylation and Demethylation on Plant Uptake of Emerging Contaminants. *Environ Int* **2022**, *170*, 107612. <https://doi.org/10.1016/j.envint.2022.107612>.
- (3) Trapp, S. Bioaccumulation of Polar and Ionizable Compounds in Plants. In *Ecotoxicology Modeling*; Devillers, J., Ed.; Springer US: Boston, MA, 2009; pp 299–353. [https://doi.org/10.1007/978-1-4419-0197-2\\_11](https://doi.org/10.1007/978-1-4419-0197-2_11).
- (4) Ding, J.; Lu, G.; Liu, J.; Yang, H.; Li, Y. Uptake, Depuration, and Bioconcentration of Two Pharmaceuticals, Roxithromycin and Propranolol, in *Daphnia Magna*. *Ecotoxicol Environ Saf* **2016**, *126*, 85–93.  
<https://doi.org/10.1016/j.ecoenv.2015.12.020>.
